# Supplementary material for: A comprehensive analysis of rare genetic variation in amyotrophic lateral sclerosis in the UK
Source: PubMed Central journal article supplement (PMC5445258; doi:10.1093/brain/awx082), 2017-04-18
Supplement: awx082_Supp.pdf [file awx082_Supp.pdf]

## Supplementary material

### Variation in untranslated regions

There are a number of studies which report UTR variants in ALS with uncertain pathogenicity. Rutherford *et al.* (2008) report six UTR alterations in *TARDBP* but do not reveal how many cases each variant was in or if these were present in controls. In 2009, a French cohort of 285 sporadic ALS cases were sequenced to reveal one patient harbouring c.\*1462T>C in *TARDBP* which was not in 360 controls (Daoud *et al.*, 2009). Then four UTR alterations were reported in this gene in 410 ALS/FTD cases in Belgium (Gijssels *et al.*, 2009). Two *FUS* 3'UTR changes were present in an Italian ALS cohort but the authors did not reveal if they were present in their 376 controls which seems likely given that c.\*41G>A is a common polymorphism (Ticozzi *et al.*, 2009). The *FUS* c.\*24G<C change was detected in a fALS proband which was absent from 970 controls and two affected relatives indicating it is likely to be a rare polymorphism (Groen *et al.*, 2010). Another study revealed UTR variants in *FUS* and *SOD1* in ALS but it is not explicitly stated if they also sequenced their 700 controls for these regions (DeJesus-Hernandez *et al.*, 2010). Drepper *et al.* (2011) and Zou *et al.* (2012) both report these non-coding *FUS* changes in ALS that are absent from controls while in *VCP*, c.\*12C<T is present in cases and not 1,205 controls (Abramzon *et al.*, 2012). Lastly, *ANG* and *FUS* were reported to have UTR mutations not present in controls, one of which we also found solely in cases, namely c.\*132C<A (Brown *et al.*, 2012). While this collection of papers seem to indicate a burden of UTR variation in ALS, not a single report mentions if any rare variation existed solely in controls. This piece of information is lacking in many publications and not just for UTR data.

## Oligogenic ALS

van Blitterswijk *et al.* (2012a) found five families with multiple mutations (5% of their familial cohort) which was statistically more than that expected by chance. Another study by van Blitterswijk *et al.* (2012b) found a novel *VAPB* variant alongside the *C9orf72* mutation, however, the pathogenicity of the *VAPB* mutation was not confirmed. Lastly, Bury *et al.* (2016) published a patient with mutations in both *OPTN* and *C9orf72*. The aggregates within motor and non-motor neuronal cells were studied in this patient to reveal *OPTN* staining in aggregates even in cells absent for TARDBP-positive inclusions.

## Common variation

*OPTN* is known to cause both ALS and primary open angle glaucoma (POAG) although individual mutations appear to only cause one of these diseases and never both, suggesting that there are completely different mechanisms by which it causes each (Swarup *et al.*, 2013). We identified two known variants which are both reported to cause POAG: N303K and R545Q (Rezaie *et al.*, 2002; Mukhopadhyay *et al.*, 2005; Buentello-Volante *et al.*, 2013). The former is present in a sporadic ALS patient and the latter in both one control and one person with sporadic ALS, suggesting that these variants do not cause POAG or ALS. These findings challenge the current literature and imply a difficulty in characterising novel variants found in a disease, particularly if insufficient controls have been sequenced.

Other variants previously reported which have been found in our controls include the *CHMP2B* I29V (0.2% of cases and 0.3% of controls). This variant was found in ALS patients (Parkinson *et al.*, 2006) while functional work in cells indicated that it causes cytoplasmic vacuoles (Cox *et al.*, 2010). The K238E variant in *SQSTM1* was found in two studies restricted to ALS (Rubino *et al.*, 2012; Cady *et al.*, 2015) but only the former sequenced controls (n=145) whereas four of our control group had this mutation (0.7%). A single control patient had the I27V alteration in *VCP* which has been described in FTD and not in

461 controls (Rohrer *et al.*, 2011; Beck *et al.*, 2014), nevertheless, the latter group identified I27V in combination with another mutation and so some of these variants may be risk factors for disease rather than causal alone.

Supplementary Table 1. Summary of patients used in this study.

|          | Total number | Female | Male | Average age of onset (range) | ALS-Definite | ALS-Probable | PMA/PLS/PBP |
|----------|--------------|--------|------|------------------------------|--------------|--------------|-------------|
| Familial | 131          | 49%    | 51%  | 56 (24-85)                   | 44%          | 49%          | 7%          |
| Sporadic | 995          | 43%    | 57%  | 61 (25-88)                   | 38%          | 49%          | 13%         |
| Control  | 613          | 38%    | 62%  | N/A                          | N/A          | N/A          | N/A         |

Supplementary Table 2. Overview of coverage for each gene within coding and non-coding regions.

| Gene   | Exon | Intron | UTR  | Average coverage |
|--------|------|--------|------|------------------|
| ALS2   | Part | Part   | None | 103x             |
| ANG    | Full | Part   | Full | 139x             |
| CHMP2B | Full | Part   | Part | 104x             |
| DAO    | Part | Part   | None | 208x             |
| DCTN1  | Part | Part   | None | 132x             |
| FIG4   | Part | Part   | None | 139x             |
| FUS    | Full | Part   | Full | 165x             |
| NEFH   | Part | None   | None | 150x             |
| OPTN   | Full | Part   | Full | 112x             |
| PFN1   | Full | Part   | Part | 86x              |
| PON1   | Part | Part   | Part | 115x             |
| PON2   | None | Part   | None | 42x              |
| PON3   | Part | Part   | None | 68x              |
| PRPH   | Part | Part   | None | 55x              |
| SETX   | Part | Part   | None | 121x             |
| SOD1   | Full | Part   | Full | 154x             |
| SQSTM1 | Part | Part   | Part | 81x              |
| TARDBP | Full | Part   | Full | 232x             |
| TREM2  | Part | Part   | None | 132x             |
| UBQLN2 | Full | N/A    | Full | 122x             |
| VAPB   | Part | Part   | None | 150x             |
| VCP    | Full | Part   | Full | 180x             |
| VEGFA  | Part | Part   | Part | 30x              |

Supplementary Table 3. List of transcripts used in this study.

| Gene   | Transcript   |
|--------|--------------|
| ALS2   | NM_020919    |
| ANG    | NM_001145    |
| CHMP2B | NM_014043    |
| DAO    | NM_001917    |
| DCTN1  | NM_004082    |
| FIG4   | NM_014845    |
| FUS    | NM_004960    |
| NEFH   | NM_021076    |
| OPTN   | NM_001008211 |
| PFN1   | NM_005022    |
| PON1   | NM_000446    |
| PON2   | NM_001018161 |
| PON3   | NM_000940    |
| PRPH   | NM_006262    |
| SETX   | NM_015046    |
| SOD1   | NM_000454    |
| SQSTM1 | NM_003900    |
| TARDBP | NM_007375    |

|        |              |
|--------|--------------|
| TREM2  | NM_018965    |
| UBQLN2 | NM_013444    |
| VAPB   | NM_004738    |
| VCP    | NM_007126    |
| VEGFA  | NM_001025366 |

Supplementary Table 4. Extension of Table 1 of the list of previously reported variants and the references associated with them. SP = spastic paraplegia; CMT = Charcot-Marie-Tooth disease; PD = Parkinson's disease; ET = essential tremor; POAG = primary open angle glaucoma; NS = not significant;

| Chromosome | Base pair | Gene   | Nucleotide change | Amino acid change | No. patients | No. controls | Reference(s)                                                         |
|------------|-----------|--------|-------------------|-------------------|--------------|--------------|----------------------------------------------------------------------|
| 1          | 11076931  | TARDBP | C269T             | A90V              | 2            | 1            | Guerreiro <i>et al.</i> , 2008; Winton <i>et al.</i> , 2008          |
| 1          | 11082325  | TARDBP | G859A             | G287S             | 2            | 0            | Kabashi <i>et al.</i> , 2008                                         |
| 1          | 11082428  | TARDBP | C962T             | A321V             | 1            | 0            | Kirby <i>et al.</i> , 2010                                           |
| 1          | 11082475  | TARDBP | A1009G            | M337V             | 1            | 0            | Sreedharan <i>et al.</i> , 2008                                      |
| 1          | 11082509  | TARDBP | G1043T            | G348V             | 1            | 0            | Kirby <i>et al.</i> , 2010                                           |
| 1          | 11082588  | TARDBP | T1122G            | Y374X             | 1            | 0            | Daoud <i>et al.</i> , 2009                                           |
| 1          | 11082598  | TARDBP | A1132G            | N378D             | 2            | 0            | Tsai <i>et al.</i> , 2011                                            |
| 2          | 74588717  | DCTN1  | C3746T            | T1249I            | 0            | 5            | Cady <i>et al.</i> , 2015; Münch <i>et al.</i> , 2004                |
| 2          | 74594023  | DCTN1  | C2353T            | R785W             | 1            | 1            | Münch <i>et al.</i> , 2004                                           |
| 2          | 202626437 | ALS2   | A280G             | I94V              | 0            | 33           | NS: Hand <i>et al.</i> , 2003; SP: Herzfeld <i>et al.</i> , 2009     |
| 3          | 87289899  | CHMP2B | A85G              | I29V              | 2            | 2            | Cox <i>et al.</i> , 2010; Parkinson <i>et al.</i> , 2006             |
| 3          | 87294943  | CHMP2B | G206A             | R69Q              | 1            | 0            | van Blitterswijk <i>et al.</i> , 2012c                               |
| 3          | 87294985  | CHMP2B | C248T             | T83I              | 0            | 1            | van Blitterswijk <i>et al.</i> , 2012c                               |
| 5          | 179251013 | SQSTM1 | G457A             | V153I             | 0            | 1            | Cady <i>et al.</i> , 2015                                            |
| 5          | 179251184 | SQSTM1 | A712G             | K238E             | 11           | 4            | Cady <i>et al.</i> , 2015; Rubino <i>et al.</i> , 2012               |
| 5          | 179263445 | SQSTM1 | C1175T            | P392L             | 5            | 2            | Fecto <i>et al.</i> , 2011                                           |
| 6          | 41129105  | TREM2  | C287A             | T96K              | 0            | 1            | Dementia: Guerreiro <i>et al.</i> , 2013                             |
| 6          | 41129207  | TREM2  | G185A             | R62H              | 0            | 10           | FTD: Lattante <i>et al.</i> , 2013                                   |
| 6          | 41129252  | TREM2  | G140A             | R47H              | 7            | 4            | Cady <i>et al.</i> , 2014; Rayaprolu <i>et al.</i> , 2013            |
| 6          | 110036336 | FIG4   | T122C             | I41T              | 3            | 5            | CMT: Chow <i>et al.</i> , 2007; Lenk <i>et al.</i> , 2011            |
| 9          | 35066777  | VCP    | A340G             | I114V             | 1            | 0            | CMT: Gonzalez <i>et al.</i> , 2014                                   |
| 9          | 35068298  | VCP    | A79G              | I27V              | 0            | 1            | FTD: Beck <i>et al.</i> , 2014; Rohrer <i>et al.</i> , 2011          |
| 9          | 135140020 | SETX   | T7640C            | I2547T            | 12           | 8            | Arning <i>et al.</i> , 2012; Rudnik-Schöneborn <i>et al.</i> , 2012  |
| 9          | 135204004 | SETX   | A2981G            | D994G             | 0            | 1            | Cady <i>et al.</i> , 2015                                            |
| 9          | 135204010 | SETX   | A2975G            | K992R             | 0            | 16           | Arning <i>et al.</i> , 2012; Nanetti <i>et al.</i> , 2013            |
| 9          | 135224757 | SETX   | G59A              | R20H              | 0            | 13           | Arning <i>et al.</i> , 2012                                          |
| 10         | 13152400  | OPTN   | T293A             | M98K              | 55           | 33           | POAG: Rezaie <i>et al.</i> , 2002                                    |
| 10         | 13178802  | OPTN   | A1670G            | K557R             | 0            | 1            | Del Bo <i>et al.</i> , 2011                                          |
| 12         | 49689009  | PRPH   | G26A              | R9Q               | 0            | 12           | Gros-Louis <i>et al.</i> , 2004                                      |
| 12         | 49690798  | PRPH   | G829A             | A277T             | 0            | 20           | Corrado <i>et al.</i> , 2011; Gros-Louis <i>et al.</i> , 2004        |
| 14         | 21161845  | ANG    | A122T             | K41I              | 0            | 2            | Cady <i>et al.</i> , 2015; Greenway <i>et al.</i> , 2006             |
| 14         | 21161973  | ANG    | A250G             | K84E              | 1            | 0            | Brown <i>et al.</i> , 2012; Cady <i>et al.</i> , 2015                |
| 16         | 31201719  | FUS    | C1292T            | P431L             | 1            | 0            | ET: Rajput <i>et al.</i> , 2014                                      |
| 16         | 31202410  | FUS    | G1520A            | G507D             | 1            | 0            | Corrado <i>et al.</i> , 2010                                         |
| 16         | 31202739  | FUS    | C1561T            | R521C             | 1            | 0            | Suzuki <i>et al.</i> , 2010; Tateishi <i>et al.</i> , 2010           |
| 16         | 31202740  | FUS    | G1562A            | R521H             | 2            | 0            | Blair <i>et al.</i> , 2010; FTD: van Langenhove <i>et al.</i> , 2010 |
| 16         | 31202740  | FUS    | G1562T            | R521L             | 1            | 0            | Deng <i>et al.</i> , 2010; Zou <i>et al.</i> , 2012                  |
| 17         | 4849268   | PFN1   | A350G             | E117G             | 1            | 1            | Fratta <i>et al.</i> , 2014; Wu <i>et al.</i> , 2012                 |
| 20         | 57014075  | VAPB   | T390G             | D130E             | 0            | 1            | Cady <i>et al.</i> , 2015                                            |
| 20         | 57016076  | VAPB   | G510A             | M170I             | 7            | 1            | van Blitterswijk <i>et al.</i> , 2012b                               |
| 20         | 57016117  | VAPB   | G551A             | R184Q             | 1            | 0            | PD: Kun-Rodrigues <i>et al.</i> , 2015                               |
| 21         | 33032107  | SOD1   | C25G              | L9V               | 1            | 0            | Andersen <i>et al.</i> , 2003                                        |
| 21         | 33038821  | SOD1   | G229T             | D77Y              | 3            | 0            | Cady <i>et al.</i> , 2015; Eisen <i>et al.</i> , 2008                |
| 21         | 33039603  | SOD1   | A272C             | D91A              | 3            | 0            | Robberecht <i>et al.</i> , 1996                                      |
| 21         | 33039636  | SOD1   | A305G             | D102G             | 1            | 0            | Ayers <i>et al.</i> , 2014; Orrell <i>et al.</i> , 1999              |
| 21         | 33039650  | SOD1   | C319T             | L107F             | 1            | 0            | Hineno <i>et al.</i> , 2012; Soong <i>et al.</i> , 2014              |
| 21         | 33039666  | SOD1   | G335A             | C112Y             | 1            | 0            | Eisen <i>et al.</i> , 2008; Nakamura <i>et al.</i> , 2012            |
| 21         | 33039672  | SOD1   | T341C             | I114T             | 5            | 0            | Kokubo Y <i>et al.</i> , 1999; Lopate <i>et al.</i> , 2010           |
| 21         | 33040829  | SOD1   | A403G             | S135G             | 1            | 0            | Conte <i>et al.</i> , 2012                                           |
| 22         | 29885016  | NEFH   | G1387A            | E463K             | 173          | 109          | Daoud <i>et al.</i> , 2011                                           |
| 22         | 29885473  | NEFH   | C1844T            | P615L             | 414          | 205          | Daoud <i>et al.</i> , 2011                                           |
| 22         | 29885997  | NEFH   | 2368_2370delAAG   | K790del           | 1            | 2            | Figlewicz <i>et al.</i> , 1994                                       |
| 22         | 29886043  | NEFH   | A2414C            | E805A             | 309          | 152          | with concussion: Cavassin, 2010                                      |
| X          | 56591796  | UBQLN2 | C1490A            | P497H             | 1            | 0            | Deng <i>et al.</i> , 2011                                            |

Supplementary Table 5. List of non-exonic variants found in cases and controls.

| Gene   | Chromosome | Base pair | Location | Variant    | 1000G  | ESP6500  | CG69 | ExAC     | dbSNP137    | Frequency Controls | Frequency Patients |
|--------|------------|-----------|----------|------------|--------|----------|------|----------|-------------|--------------------|--------------------|
| TARDBP | 1          | 11072687  | UTR5     | c.-1098G>T | .      | .        | .    | .        | .           | 0.16%              | 0.44%              |
| TARDBP | 1          | 11072698  | UTR5     | c.-1087C>T | .      | .        | .    | .        | .           | 0.49%              | 0%                 |
| TARDBP | 1          | 11072699  | UTR5     | c.-1086G>A | .      | .        | .    | .        | .           | 0.16%              | 0%                 |
| TARDBP | 1          | 11072732  | UTR5     | c.-1053G>A | .      | .        | .    | .        | .           | 0%                 | 0.44%              |
| TARDBP | 1          | 11072745  | UTR5     | c.-1040T>C | .      | .        | .    | .        | .           | 0%                 | 0.36%              |
| TARDBP | 1          | 11072760  | UTR5     | c.-1025C>T | .      | .        | .    | .        | .           | 0.33%              | 0%                 |
| TARDBP | 1          | 11072802  | splicing | T>C        | .      | .        | .    | .        | .           | 0%                 | 0.27%              |
| TARDBP | 1          | 11072810  | intronic | G>A        | .      | .        | .    | .        | .           | 0%                 | 0.44%              |
| TARDBP | 1          | 11072831  | intronic | C>G        | .      | .        | .    | .        | .           | 0%                 | 0.44%              |
| TARDBP | 1          | 11074031  | intronic | C>T        | .      | .        | .    | 1.04E-03 | .           | 0%                 | 0.44%              |
| TARDBP | 1          | 11076870  | intronic | T>C        | .      | .        | .    | .        | .           | 0%                 | 0.27%              |
| TARDBP | 1          | 11076886  | intronic | G>A        | .      | 0.000692 | .    | 2.68E-04 | rs200066188 | 0%                 | 0.44%              |
| TARDBP | 1          | 11077083  | intronic | A>G        | 0.0005 | .        | .    | 1.63E-05 | rs200818944 | 0%                 | 0.44%              |
| TARDBP | 1          | 11082171  | intronic | T>A        | .      | .        | .    | .        | .           | 0%                 | 0.36%              |





|        |   |          |      |            |        |   |   |   |             |       |       |
|--------|---|----------|------|------------|--------|---|---|---|-------------|-------|-------|
| UBQLN2 | X | 56592686 | UTR3 | c.*505T>G  | -      | - | - | - | -           | 0%    | 0.18% |
| UBQLN2 | X | 56592754 | UTR3 | c.*573A>G  | -      | - | - | - | -           | 0%    | 0.09% |
| UBQLN2 | X | 56592850 | UTR3 | c.*669A>G  | -      | - | - | - | -           | 0.16% | 0%    |
| UBQLN2 | X | 56593074 | UTR3 | c.*893C>A  | -      | - | - | - | -           | 0%    | 0.18% |
| UBQLN2 | X | 56593415 | UTR3 | c.*1234G>A | 0.0018 | - | - | - | rs187165435 | 0%    | 0.09% |

Supplementary Table 6. List of patients with two variants of interest.

| Subject | Variant1          | Variant2        | El-Escorial  | Gender | Family history |
|---------|-------------------|-----------------|--------------|--------|----------------|
| 1       | TARDBP N179D      | TARDBP M337V    | ALS-Probable | Male   | Sporadic       |
| 2       | C9orf72 expansion | VCP R155H       | ALS-Definite | Male   | Sporadic       |
| 3       | C9orf72 expansion | TARDBP A321V    | ALS-Probable | Male   | Familial       |
| 4       | C9orf72 expansion | UBQLN2 T334M    | ALS-Definite | Female | Sporadic       |
| 5       | C9orf72 expansion | ALS2 S654G      | ALS-Definite | Male   | Familial       |
| 6       | C9orf72 expansion | ANG K78E        | ALS-Definite | Female | Familial       |
| 7       | C9orf72 expansion | OPTN c.626+1G>T | ALS-Probable | Male   | Sporadic       |
| 8       | FUS S135N         | SOD1 D77Y       | ALS-Definite | Male   | Familial       |
| 9       | OPTN R271H        | FUS R269W       | ALS-Definite | Female | Familial       |
| 10      | SOD1 D91A         | UBQLN2 Q460R    | ALS-Probable | Male   | Familial       |
| 11      | ALS2 P1288L       | SOD1 I114T      | ALS-Probable | Male   | Familial       |
| 12      | ALS2 P372R        | TARDBP A90V     | Control      | Female | N/A            |

Supplementary Table 7. List of variants in *VEGFA* and *PON1-3*. All variants were sequenced adequately in controls however some were not adequately covered in cases. No variants were found to be significantly more in cases than controls after correction for multiple testing. Some other loci were also sequenced however they failed quality checks and so were removed, particularly in *VEGFA* due the high GC content.

| Gene  | Chromosome | Base pair | dbSNP137    | Variant         | Frequency Controls | Frequency Patient | Number of Patients Sequenced | P-value | ExAC  | 1000G |
|-------|------------|-----------|-------------|-----------------|--------------------|-------------------|------------------------------|---------|-------|-------|
| VEGFA | 6          | 43748593  | rs149528656 | c.1085+2T>C     | 0.2%               | 0%                | 95                           | 0.66    | 0.01% | NA    |
| VEGFA | 6          | 43748600  | rs201132204 | c.1085+9T>C     | 0.2%               | 0%                | 120                          | 0.56    | 1%    | NA    |
| PON1  | 7          | 94937412  | rs141624867 | c.G609A:p.S203S | 0.2%               | 0%                | 1013                         | 0.60    | 0.01% | NA    |
| PON1  | 7          | 94937418  | rs148452713 | c.G603A:p.A201A | 0%                 | 0.1%              | 1013                         | 0.01    | 0.1%  | 0.2%  |
| PON1  | 7          | 94937419  | rs80019660  | c.C602T:p.A201V | 0.5%               | 0.5%              | 1013                         | 1.00    | 0.2%  | 0.1%  |
| PON1  | 7          | 94937446  | rs662       | c.A575G:p.Q192R | 49%                | 50%               | 1108                         | 0.78    | 38%   | 52%   |
| PON1  | 7          | 94946084  | rs854560    | c.T163A:p.L55M  | 60%                | 61%               | 1108                         | 0.89    | 29%   | 20%   |
| PON1  | 7          | 94953733  | rs141948033 | c.A55G:p.N19D   | 0.4%               | 0%                | 132                          | 0.54    | 0.2%  | 0.1%  |
| PON1  | 7          | 94953881  | .           | c.-94C>T        | 0%                 | 0.2%              | 1104                         | 0.04    | NA    | NA    |
| PON1  | 7          | 94953895  | rs705379    | c.-108C>T       | 71%                | 72%               | 1104                         | 0.85    | NA    | 38%   |
| PON1  | 7          | 94953913  | rs705380    | c.-126C>G       | 99%                | 99%               | 1105                         | 0.42    | NA    | 95%   |
| PON3  | 7          | 94993261  | rs17880470  | c.T609C:p.Y203Y | 2%                 | 0.8%              | 119                          | 0.54    | 0.4%  | 0.3%  |
| PON3  | 7          | 94993334  | rs17883013  | c.C536A:p.A179D | 0%                 | 1%                | 95                           | 0.02    | 0.5%  | 1%    |
| PON3  | 7          | 95001555  | rs1053275   | c.G297A:p.A99A  | 71%                | 71%               | 95                           | 0.52    | 57%   | 63%   |
| PON3  | 7          | 95001590  | rs78883915  | c.A262G:p.M88V  | 0.2%               | 0%                | 95                           | 0.66    | 0.1%  | 0.1%  |
| PON2  | 7          | 95034775  | rs7493      | c.C932G:p.S311C | 43%                | 0%                | 95                           | 0.50    | 27%   | 26%   |
| PON2  | 7          | 95034821  | rs9641164   | c.907-21T>A     | 34%                | 42%               | 95                           | 0.14    | 24%   | 30%   |
| PON2  | 7          | 95041016  | rs12026     | c.C407G:p.A136G | 43%                | 8%                | 95                           | 0.75    | 27%   | 26%   |
| PON2  | 7          | 95041135  | rs17876141  | c.368-44G>A     | 0%                 | 1%                | 95                           | 0.03    | 0.6%  | 2%    |
| PON2  | 7          | 95041704  | rs201552995 | c.G287C:p.R96T  | 0.4%               | 1%                | 95                           | 0.45    | NA    | NA    |

Supplementary Table 8. Variants included in Fig. 1 and the references and extra information associated with each.

| Gene | Variant  | No. of variants in patients | Total no. of patients | No. of variants in controls | Total no. of controls | Reference                  | Nationality   |
|------|----------|-----------------------------|-----------------------|-----------------------------|-----------------------|----------------------------|---------------|
| FUS  | c.-54A>G | 187                         | 446                   | NA                          | NA                    | Brown <i>et al.</i> , 2012 | United states |
| FUS  | c.-2A>T  | 1                           | 66                    | 0                           | 561                   | Yan <i>et al.</i> , 2010   | Italian       |
| FUS  | c.*14C>T | 2                           | 220                   | 0                           | 151                   | Zou <i>et al.</i> , 2012   | Caucasian     |
| FUS  | c.*41G>A | 3                           | 323                   | 0                           | 216                   | Brown <i>et al.</i> , 2012 | United States |

|        |            |    |      |    |     |                                        |               |
|--------|------------|----|------|----|-----|----------------------------------------|---------------|
| FUS    | c.*41G>A   | 29 | 1009 | 17 | 538 | Corrado <i>et al.</i> , 2010           | Italian       |
| FUS    | c.*41G>A   | 2  | 70   | 9  | 569 | Huey <i>et al.</i> , 2012              | United states |
| FUS    | c.*41G>A   | 1  | 94   | 0  | 376 | Ticozzi <i>et al.</i> , 2009           | Chinese       |
| FUS    | c.*41G>A   | 1  | 116  | 0  | 700 | DeJesus-Hernandez <i>et al.</i> , 2010 | Italian       |
| FUS    | c.*41G>A   | 20 | 420  | 17 | 480 | Sabatelli <i>et al.</i> , 2013         | Italian       |
| FUS    | c.*47C>T   | 1  | 116  | 0  | 700 | De-Jesus-Hernandez 2010                | Italian       |
| FUS    | C.-48G>A   | 1  | 420  | 0  | 480 | Sabatelli <i>et al.</i> , 2013         | Italian       |
| FUS    | C.*59G>A   | 1  | 420  | 0  | 480 | Sabatelli <i>et al.</i> , 2013         | Italian       |
| FUS    | C.*105dup  | 1  | 323  | 0  | 216 | Brown <i>et al.</i> , 2012             | United States |
| FUS    | C.*108C>T  | 1  | 420  | 0  | 480 | Sabatelli <i>et al.</i> , 2013         | Italian       |
| FUS    | C.*110G>A  | 1  | 420  | 0  | 480 | Sabatelli <i>et al.</i> , 2013         | Italian       |
| FUS    | c.*132C>A  | 1  | 323  | 0  | 216 | Brown <i>et al.</i> , 2012             | United States |
| FUS    | c.*190C>A  | 1  | 323  | 0  | 216 | Brown <i>et al.</i> , 2012             | United States |
| FUS    | c.*214C>T  | 3  | 446  | 4  | 216 | Brown <i>et al.</i> , 2012             | United states |
| FUS    | c.*214C>T  | 6  | 420  | 10 | 480 | Sabatelli <i>et al.</i> , 2013         | Italian       |
| TARDBP | c.*82A>G   | 0  | 177  | 1  | 200 | Chiang <i>et al.</i> , 2012            | Nordic        |
| TARDBP | c.*620A>G  | 1  | 177  | 0  | 200 | Chiang <i>et al.</i> , 2012            | Nordic        |
| TARDBP | c.*533C>G  | 0  | 177  | 1  | 200 | Chiang <i>et al.</i> , 2012            | Nordic        |
| TARDBP | c.*343G>A  | 0  | 177  | 1  | 200 | Chiang <i>et al.</i> , 2012            | Nordic        |
| TARDBP | c.*208G>A  | 16 | 177  | 18 | 200 | Chiang <i>et al.</i> , 2012            | Nordic        |
| TARDBP | c.*2076G>A | 2  | 38   | 0  | 982 | Gitcho <i>et al.</i> , 2009            | United States |
| TARDBP | c.*1622A>T | 1  | 177  | 1  | 200 | Chiang <i>et al.</i> , 2012            | Nordic        |
| TARDBP | c.*1462T>C | 1  | 285  | 0  | 360 | Daoud <i>et al.</i> , 2009             | French        |
| TARDBP | c.*1453G>A | 6  | 149  | 4  | 100 | Benajiba <i>et al.</i> , 2009          | French        |
| TARDBP | c.*1008T>G | 1  | 177  | 1  | 200 | Chiang <i>et al.</i> , 2012            | Nordic        |

## Supplemental references

Abramzon Y, Johnson JO, Scholz SW, Taylor JP, Brunetti M, Calvo A, et al. Valosin-containing protein (VCP) mutations in sporadic amyotrophic lateral sclerosis. *Neurobiol. Aging* 2012; 33: 2231.e1-2231.e6.

Andersen PM, Sims KB, Xin WW, Kiely R, O'Neill G, Ravits J, et al. Sixteen novel mutations in the Cu/Zn superoxide dismutase gene in amyotrophic lateral sclerosis: a decade of discoveries, defects and disputes. *Amyotroph. Lateral Scler. Other Motor Neuron Disord.* 2003; 4: 62–73.

Arning L, Epplen JT, Rahikkala E, Hendrich C, Ludolph AC, Sperfeld A-D. The SETX missense variation spectrum as evaluated in patients with ALS4-like motor neuron diseases. *neurogenetics* 2012; 14: 53–61.

Ayers J, Lelie H, Workman A, Prudencio M, Brown H, Fromholt S, et al. Distinctive features of the D101N and D101G variants of superoxide dismutase 1; two mutations that produce rapidly progressing motor neuron disease. *J. Neurochem.* 2014; 128: 305–314.

Beck J, Pittman A, Adamson G, Campbell T, Kenny J, Houlden H, et al. Validation of next-generation sequencing technologies in genetic diagnosis of dementia. *Neurobiol. Aging* 2014; 35: 261–265.

Benajiba L, Le Ber I, Camuzat A, Lacoste M, Thomas-Anterion C, Couratier P, et al. TARDBP mutations in motoneuron disease with frontotemporal lobar degeneration. *Ann. Neurol.* 2009; 65: 470–473.



- Blair IP, Williams KL, Warraich ST, Durnall JC, Thoeng AD, Manavis J, et al. FUS mutations in amyotrophic lateral sclerosis: clinical, pathological, neurophysiological and genetic analysis. *J. Neurol. Neurosurg. Psychiatry* 2010; 81: 639–645.
- van Blitterswijk M, van Es MA, Hennekam EAM, Dooijes D, van Rheenen W, Medic J, et al. Evidence for an oligogenic basis of amyotrophic lateral sclerosis. *Hum. Mol. Genet.* 2012; 21: 3776–3784.
- van Blitterswijk M, van Es MA, Koppers M, van Rheenen W, Medic J, Schelhaas HJ, et al. VAPB and C9orf72 mutations in 1 familial amyotrophic lateral sclerosis patient. *Neurobiol. Aging* 2012; 33: 2950.e1-4.
- van Blitterswijk M, Vlam L, van Es MA, van der Pol W-L, Hennekam EAM, Dooijes D, et al. Genetic overlap between apparently sporadic motor neuron diseases. *PloS One* 2012; 7: e48983.
- Brown JA, Min J, Staropoli JF, Collin E, Bi S, Feng X, et al. SOD1, ANG, TARDBP and FUS mutations in amyotrophic lateral sclerosis: a United States clinical testing lab experience. *Amyotroph. Lateral Scler. Off. Publ. World Fed. Neurol. Res. Group Mot. Neuron Dis.* 2012; 13: 217–222.
- Buentello-Volante B, Elizondo-Olascoaga C, Miranda-Duarte A, Guadarrama-Vallejo D, Cabral-Macias J, Zenteno JC. Association study of multiple gene polymorphisms with the risk of adult-onset primary open-angle glaucoma in a Mexican population. *Exp. Eye Res.* 2013; 107: 59–64.
- Bury JJ, Highley JR, Cooper-Knock J, Goodall EF, Higginbottom A, McDermott CJ, et al. Oligogenic inheritance of optineurin (OPTN) and C9ORF72 mutations in ALS highlights localisation of OPTN in the TDP-43-negative inclusions of C9ORF72-ALS. *Neuropathol. Off. J. Jpn. Soc. Neuropathol.* 2016; 36: 125–134.
- Cady J, Allred P, Bali T, Pestronk A, Goate A, Miller TM, et al. Amyotrophic lateral sclerosis onset is influenced by the burden of rare variants in known amyotrophic lateral sclerosis genes. *Ann. Neurol.* 2015; 77: 100–113.
- Cady J, Koval ED, Benitez BA, Zaidman C, Jockel-Balsarotti J, Allred P, et al. TREM2 variant p.R47H as a risk factor for sporadic amyotrophic lateral sclerosis. *JAMA Neurol.* 2014; 71: 449–453.
- Chiang H-H, Andersen PM, Tysnes O-B, Gredal O, Christensen PB, Graff C. Novel TARDBP mutations in Nordic ALS patients. *J. Hum. Genet.* 2012; 57: 316–319.
- Chow CY, Zhang Y, Dowling JJ, Jin N, Adamska M, Shiga K, et al. Mutation of FIG4 causes neurodegeneration in the pale tremor mouse and patients with CMT4J. *Nature* 2007; 448: 68–72.
- Conte A, Lattante S, Luigetti M, Grande AD, Romano A, Marcaccio A, et al. Classification of familial amyotrophic lateral sclerosis by family history: effects on frequency of genes mutation. *J. Neurol. Neurosurg. Psychiatry* 2012: jnnp-2012-302897.
- Corrado L, Bo RD, Castellotti B, Ratti A, Cereda C, Penco S, et al. Mutations of FUS gene in sporadic amyotrophic lateral sclerosis. *J. Med. Genet.* 2010; 47: 190–194.

Corrado L, Carlomagno Y, Falasco L, Mellone S, Godi M, Cova E, et al. A novel peripherin gene (PRPH) mutation identified in one sporadic amyotrophic lateral sclerosis patient. *Neurobiol. Aging* 2011; 32: 552.e1-552.e6.

Covassin T. Free Communications, Oral Presentations: New Concepts in the Study of Sports-Related Concussion Dilemma. *J. Athl. Train.* 2010; 45: S29–S31.

Cox LE, Ferraiuolo L, Goodall EF, Heath PR, Higginbottom A, Mortiboys H, et al. Mutations in CHMP2B in Lower Motor Neuron Predominant Amyotrophic Lateral Sclerosis (ALS). *PLOS ONE* 2010; 5: e9872.

Daoud H, Valdmanis PN, Gros-Louis F, Belzil V, Spiegelman D, Henrion E, et al. Resequencing of 29 candidate genes in patients with familial and sporadic amyotrophic lateral sclerosis. *Arch. Neurol.* 2011; 68: 587–593.

Daoud H, Valdmanis PN, Kabashi E, Dion P, Dupré N, Camu W, et al. Contribution of TARDBP mutations to sporadic amyotrophic lateral sclerosis. *J. Med. Genet.* 2009; 46: 112–114.

DeJesus-Hernandez, Kocerha J, Finch N, Crook R, Baker M, Desaro P, et al. De novo truncating FUS gene mutation as a cause of sporadic amyotrophic lateral sclerosis. *Hum. Mutat.* 2010; 31: E1377–E1389.

Del Bo R, Tiloca C, Pensato V, Corrado L, Ratti A, Ticozzi N, et al. Novel optineurin mutations in patients with familial and sporadic amyotrophic lateral sclerosis. *J. Neurol. Neurosurg. Psychiatry* 2011; 82: 1239–1243.

Deng H-X, Chen W, Hong S-T, Boycott KM, Gorrie GH, Siddique N, et al. Mutations in UBQLN2 cause dominant X-linked juvenile and adult-onset ALS and ALS/dementia. *Nature* 2011; 477: 211–215.

Deng H-X, Zhai H, Bigio EH, Yan J, Fecto F, Ajroud K, et al. FUS-immunoreactive inclusions are a common feature in sporadic and non-SOD1 familial amyotrophic lateral sclerosis. *Ann. Neurol.* 2010; 67: 739–748.

Drepper C, Herrmann T, Wessig C, Beck M, Sendtner M. C-terminal FUS/TLS mutations in familial and sporadic ALS in Germany. *Neurobiol. Aging* 2011; 32: 548.e1-4.

Eisen A, Mezei MM, Stewart HG, Fabros M, Gibson G, Andersen PM. SOD1 gene mutations in ALS patients from British Columbia, Canada: clinical features, neurophysiology and ethical issues in management. *Amyotroph. Lateral Scler. Off. Publ. World Fed. Neurol. Res. Group Mot. Neuron Dis.* 2008; 9: 108–119.

Fecto F, Yan J, Vemula SP, Liu E, Yang Y, Chen W, et al. SQSTM1 mutations in familial and sporadic amyotrophic lateral sclerosis. *Arch. Neurol.* 2011; 68: 1440–1446.

Figlewicz DA, Krizus A, Martinoli MG, Meininger V, Dib M, Rouleau GA, et al. Variants of the heavy neurofilament subunit are associated with the development of amyotrophic lateral sclerosis. *Hum. Mol. Genet.* 1994; 3: 1757–1761.

Fratia P, Charnock J, Collins T, Devoy A, Howard R, Malaspina A, et al. Profilin1 E117G is a moderate risk factor for amyotrophic lateral sclerosis. *J. Neurol. Neurosurg. Psychiatry* 2014; 85: 506–508.

Gijssels I, Sleegers K, Engelborghs S, Robberecht W, Martin J-J, Vandenberghe R, et al. Neuronal inclusion protein TDP-43 has no primary genetic role in FTD and ALS. *Neurobiol. Aging* 2009; 30: 1329–1331.

Gitcho MA, Bigio EH, Mishra M, Johnson N, Weintraub S, Mesulam M, et al. TARDBP 3'-UTR variant in autopsy-confirmed frontotemporal lobar degeneration with TDP-43 proteinopathy. *Acta Neuropathol. (Berl.)* 2009; 118: 633–645.

Gonzalez MA, Feely SM, Spezziani F, Strickland AV, Danzi M, Bacon C, et al. A novel mutation in VCP causes Charcot-Marie-Tooth Type 2 disease. *Brain J. Neurol.* 2014; 137: 2897–2902.

Greenway MJ, Andersen PM, Russ C, Ennis S, Cashman S, Donaghy C, et al. ANG mutations segregate with familial and 'sporadic' amyotrophic lateral sclerosis. *Nat. Genet.* 2006; 38: 411–413.

Groen EJM, van Es MA, van Vught PWJ, Spliet WGM, van Engelen-Lee J, de Visser M, et al. FUS mutations in familial amyotrophic lateral sclerosis in the Netherlands. *Arch. Neurol.* 2010; 67: 224–230.

Gros-Louis F, Larivière R, Gowing G, Laurent S, Camu W, Bouchard J-P, et al. A Frameshift Deletion in Peripherin Gene Associated with Amyotrophic Lateral Sclerosis. *J. Biol. Chem.* 2004; 279: 45951–45956.

Guerreiro RJ, Lohmann E, Brás JM, Gibbs JR, Rohrer JD, Guranlian N, et al. Using exome sequencing to reveal mutations in TREM2 presenting as a frontotemporal dementia-like syndrome without bone involvement. *JAMA Neurol.* 2013; 70: 78–84.

Guerreiro RJ, Schymick JC, Crews C, Singleton A, Hardy J, Traynor BJ. TDP-43 Is Not a Common Cause of Sporadic Amyotrophic Lateral Sclerosis. *PLOS ONE* 2008; 3: e2450.

Hand CK, Devon RS, Gros-Louis F, Rochefort D, Khoris J, Meininger V, et al. Mutation screening of the ALS2 gene in sporadic and familial amyotrophic lateral sclerosis. *Arch. Neurol.* 2003; 60: 1768–1771.

Herzfeld T, Wolf N, Winter P, Hackstein H, Vater D, Müller U. Maternal uniparental heterodisomy with partial isodisomy of a chromosome 2 carrying a splice acceptor site mutation (IVS9-2A>T) in ALS2 causes infantile-onset ascending spastic paralysis (IAHSP). *Neurogenetics* 2009; 10: 59–64.

Hineno A, Nakamura A, Shimojima Y, Yoshida K, Oyanagai K, Ikeda S. Distinctive clinicopathological features of 2 large families with amyotrophic lateral sclerosis having L106V mutation in SOD1 gene. *J. Neurol. Sci.* 2012; 319: 63–74.

Huey ED, Ferrari R, Moreno JH, Jensen C, Morris CM, Potocnik F, et al. FUS and TDP43 genetic variability in FTD and CBS. *Neurobiol. Aging* 2012; 33: 1016.e9-1016.17.

Kabashi E, Valdmanis PN, Dion P, Spiegelman D, McConkey BJ, Vande Velde C, et al. TARDBP mutations in individuals with sporadic and familial amyotrophic lateral sclerosis. *Nat. Genet.* 2008; 40: 572–574.

Kirby J, Goodall EF, Smith W, Highley JR, Masanzu R, Hartley JA, et al. Broad clinical phenotypes associated with TAR-DNA binding protein (TARDBP) mutations in amyotrophic lateral sclerosis. *Neurogenetics* 2010; 11: 217–225.

Kokubo Y, Kuzuhara S, Narita Y, et al. Accumulation of neurofilaments and sod1-immunoreactive products in a patient with familial amyotrophic lateral sclerosis with i113t sod1 mutation. *Arch. Neurol.* 1999; 56: 1506–1508.

Kun-Rodrigues C, Ganos C, Guerreiro R, Schneider SA, Schulte C, Lesage S, et al. A systematic screening to identify de novo mutations causing sporadic early-onset Parkinson's disease. *Hum. Mol. Genet.* 2015; 24: 6711–6720.

Lattante S, Le Ber I, Camuzat A, Dayan S, Godard C, Van Bortel I, et al. TREM2 mutations are rare in a French cohort of patients with frontotemporal dementia. *Neurobiol. Aging* 2013; 34: 2443.e1-2.

Lenk GM, Ferguson CJ, Chow CY, Jin N, Jones JM, Grant AE, et al. Pathogenic mechanism of the FIG4 mutation responsible for Charcot-Marie-Tooth disease CMT4J. *PLoS Genet.* 2011; 7: e1002104.

Lopate G, Baloh RH, Al-Lozi MT, Miller TM, Fernandes Filho JA, Ni O, et al. Familial ALS with extreme phenotypic variability due to the I113T SOD1 mutation. *Amyotroph. Lateral Scler. Off. Publ. World Fed. Neurol. Res. Group Mot. Neuron Dis.* 2010; 11: 232–236.

Mukhopadhyay A, Komatireddy S, Acharya M, Bhattacharjee A, Mandal AK, Thakur SKD, et al. Evaluation of Optineurin as a candidate gene in Indian patients with primary open angle glaucoma. *Mol. Vis.* 2005; 11: 792–797.

Münch C, Sedlmeier R, Meyer T, Homberg V, Sperfeld AD, Kurt A, et al. Point mutations of the p150 subunit of dynactin (DCTN1) gene in ALS. *Neurology* 2004; 63: 724–726.

Nakamura A, Hinenno A, Yoshida K, Sekijima Y, Hanaoka-Tachibana N, Takei Y-I, et al. Marked intrafamilial phenotypic variation in a family with SOD1 C111Y mutation. *Amyotroph. Lateral Scler. Off. Publ. World Fed. Neurol. Res. Group Mot. Neuron Dis.* 2012; 13: 479–486.

Nanetti L, Cavalieri S, Pensato V, Erbetta A, Pareyson D, Panzeri M, et al. SETX mutations are a frequent genetic cause of juvenile and adult onset cerebellar ataxia with neuropathy and elevated serum alpha-fetoprotein. *Orphanet J. Rare Dis.* 2013; 8: 123.

Orrell RW, Habgood JJ, Malaspina A, Mitchell J, Greenwood J, Lane RJ, et al. Clinical characteristics of SOD1 gene mutations in UK families with ALS. *J. Neurol. Sci.* 1999; 169: 56–60.

Parkinson N, Ince PG, Smith MO, Highley R, Skibinski G, Andersen PM, et al. ALS phenotypes with mutations in CHMP2B (charged multivesicular body protein 2B). *Neurology* 2006; 67: 1074–1077.

Rajput A, Rajput AH, Rajput ML, Encarnacion M, Bernales CQ, Ross JP, et al. Identification of FUS p.R377W in essential tremor. *Eur. J. Neurol.* 2014; 21: 361–363.

Rayaprolu S, Mullen B, Baker M, Lynch T, Finger E, Seeley WW, et al. TREM2 in neurodegeneration: evidence for association of the p.R47H variant with frontotemporal dementia and Parkinson's disease. *Mol. Neurodegener.* 2013; 8: 19.

Rezaie T, Child A, Hitchings R, Brice G, Miller L, Coca-Prados M, et al. Adult-Onset Primary Open-Angle Glaucoma Caused by Mutations in Optineurin. *Science* 2002; 295: 1077–1079.

Robberecht W, Aguirre T, Bosch LVD, Tilkin P, Cassiman JJ, Matthijs G. D90A heterozygosity in the SOD1 gene is associated with familial and apparently sporadic amyotrophic lateral sclerosis. *Neurology* 1996; 47: 1336–1339.

Rohrer JD, Warren JD, Reiman D, Uphill J, Beck J, Collinge J, et al. A novel exon 2 I27V VCP variant is associated with dissimilar clinical syndromes. *J. Neurol.* 2011; 258: 1494–1496.

Rubino E, Rainero I, Chiò A, Rogaeva E, Galimberti D, Fenoglio P, et al. SQSTM1 mutations in frontotemporal lobar degeneration and amyotrophic lateral sclerosis. *Neurology* 2012; 79: 1556–1562.

Rudnik-Schöneborn S, Arning L, Epplen JT, Zerres K. SETX gene mutation in a family diagnosed autosomal dominant proximal spinal muscular atrophy. *Neuromuscul. Disord.* 2012; 22: 258–262.

Rutherford NJ, Zhang Y-J, Baker M, Gass JM, Finch NA, Xu Y-F, et al. Novel mutations in TARDBP (TDP-43) in patients with familial amyotrophic lateral sclerosis. *PLoS Genet.* 2008; 4: e1000193.

Sabatelli M, Moncada A, Conte A, Lattante S, Marangi G, Luigetti M, et al. Mutations in the 3' untranslated region of FUS causing FUS overexpression are associated with amyotrophic lateral sclerosis. *Hum. Mol. Genet.* 2013; 22: 4748–4755.

Soong B-W, Lin K-P, Guo Y-C, Lin C-CK, Tsai P-C, Liao Y-C, et al. Extensive molecular genetic survey of Taiwanese patients with amyotrophic lateral sclerosis. *Neurobiol. Aging* 2014; 35: 2423.e1-6.

Sreedharan J, Blair IP, Tripathi VB, Hu X, Vance C, Rogelj B, et al. TDP-43 mutations in familial and sporadic amyotrophic lateral sclerosis. *Science* 2008; 319: 1668–1672.

Suzuki N, Aoki M, Warita H, Kato M, Mizuno H, Shimakura N, et al. FALS with FUS mutation in Japan, with early onset, rapid progress and basophilic inclusion. *J. Hum. Genet.* 2010; 55: 252–254.

Swarup G, Vaibhava V, Nagabhush A. Functional Defects Caused by Glaucoma – Associated Mutations in Optineurin [Internet]. In: Rumelt S, editor(s). *Glaucoma - Basic and Clinical Aspects*. InTech; 2013. [cited 2016 Mar 21] Available from: <http://www.intechopen.com/books/glaucoma-basic-and-clinical-aspects/functional-defects-caused-by-glaucoma-associated-mutations-in-optineurin>

Tateishi T, Hokonohara T, Yamasaki R, Miura S, Kikuchi H, Iwaki A, et al. Multiple system degeneration with basophilic inclusions in Japanese ALS patients with FUS mutation. *Acta Neuropathol. (Berl.)* 2010; 119: 355–364.

Ticozzi N, Silani V, LeClerc AL, Keagle P, Gellera C, Ratti A, et al. Analysis of FUS gene mutation in familial amyotrophic lateral sclerosis within an Italian cohort. *Neurology* 2009; 73: 1180–1185.

Tsai C-P, Soong B-W, Lin K-P, Tu P-H, Lin J-L, Lee Y-C. FUS, TARDBP, and SOD1 mutations in a Taiwanese cohort with familial ALS. *Neurobiol. Aging* 2011; 32: 553.e13-553.e21.

Van Langenhove T, van der Zee J, Sleegers K, Engelborghs S, Vandenberghe R, Gijselinck I, et al. Genetic contribution of FUS to frontotemporal lobar degeneration. *Neurology* 2010; 74: 366–371.

Winton MJ, Van Deerlin VM, Kwong LK, Yuan W, Wood EM, Yu C-E, et al. A90V TDP-43 variant results in the aberrant localization of TDP-43 in vitro. *FEBS Lett.* 2008; 582: 2252–2256.

Wu C-H, Fallini C, Ticozzi N, Keagle PJ, Sapp PC, Piotrowska K, et al. Mutations in the profilin 1 gene cause familial amyotrophic lateral sclerosis. *Nature* 2012; 488: 499–503.

Yan J, Deng H-X, Siddique N, Fecto F, Chen W, Yang Y, et al. Frameshift and novel mutations in FUS in familial amyotrophic lateral sclerosis and ALS/dementia. *Neurology* 2010; 75: 807–814.

Zou Z-Y, Peng Y, Feng X-H, Wang X-N, Sun Q, Liu M-S, et al. Screening of the FUS gene in familial and sporadic amyotrophic lateral sclerosis patients of Chinese origin. *Eur. J. Neurol.* 2012; 19: 977–983.
